# Supplementary figures and images for: Collagen-mimetic hydrogels promote human endothelial cell adhesion, migration and phenotypic maturation
Source: Royal Society of Chemistry journal article supplement (doi:10.1039/c5tb00990a), 2015-01-01

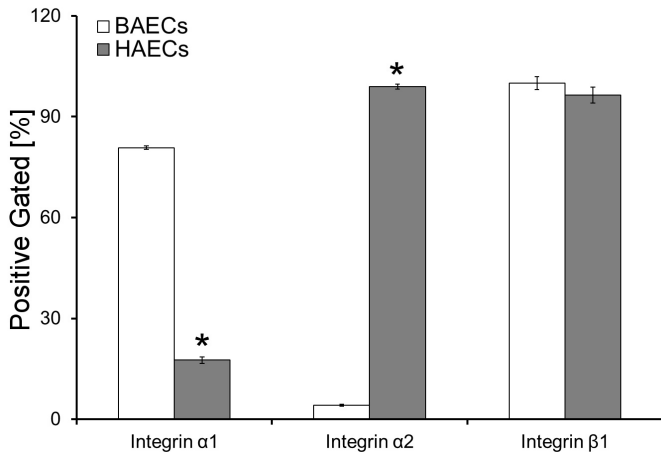

Supplement: c5tb00990a2.pdf [file c5tb00990a2.pdf]
